# Supplementary material for: Spectral Signatures of Protonated Noble Gas Clusters of Ne, Ar, Kr, and Xe: From Monomers to Trimers
Source: MDPI journal article supplement (doi:10.3390/molecules27103198), 2022-05-17
Supplement: s1 [file s1]

## **Supplementary Material for**

# **Spectral Signatures of Protonated Noble Gas Clusters of Ne, Ar, Kr, and Xe: From Monomers to Trimers**

Jake A. Tan and Jer-Lai Kuo

Institute of Atomic and Molecular Sciences, Academia Sinica  
No. 1 Roosevelt Rd., Sec. 4 Da-an District, Taipei City 10617, Taiwan (ROC)

### **Corresponding Authors:**

Jake A. Tan            Email: [jaketan@gate.sinica.edu.tw](mailto:jaketan@gate.sinica.edu.tw)

Jer-Lai Kuo            Email: [jlkuo@pub.iams.sinica.edu.tw](mailto:jlkuo@pub.iams.sinica.edu.tw)

## Table of Contents

|           |                                                                                                                                                                                          |          |
|-----------|------------------------------------------------------------------------------------------------------------------------------------------------------------------------------------------|----------|
| <b>A.</b> | <b><i>Cartesian coordinates for the <math>\text{NgH}^+</math> structures .....</i></b>                                                                                                   | <b>3</b> |
| <b>B.</b> | <b><i>Comparison of Mulliken Charges and Natural Atomic Charges .....</i></b>                                                                                                            | <b>4</b> |
| <b>C.</b> | <b><i>Sensitivity of the <math>\text{NgH}^+</math> anharmonic frequencies with basis set's size .....</i></b>                                                                            | <b>4</b> |
| <b>D.</b> | <b><i>Cartesian coordinates for the <math>\text{NgH}^+\text{Ng}</math> structures .....</i></b>                                                                                          | <b>5</b> |
| <b>E.</b> | <b><i>Cartesian coordinates for the <math>\text{NgH}^+\text{Ng}'</math> structures .....</i></b>                                                                                         | <b>6</b> |
| <b>F.</b> | <b><i>Cartesian coordinates for the <math>\text{Ng}_3\text{H}^+</math> T-shaped structures .....</i></b>                                                                                 | <b>7</b> |
| <b>G.</b> | <b><i>Cartesian coordinates for the <math>\text{Ng}_3\text{H}^+</math> linear structures .....</i></b>                                                                                   | <b>8</b> |
| <b>H.</b> | <b><i>Compilation of CCSD(T)/aug-cc-pVTZ<sup>a</sup> electronic energy, zero-point energy, standard enthalpy, and standard free energies for protonated noble gas clusters .....</i></b> | <b>9</b> |

## A. Cartesian coordinates for the $\text{NgH}^+$ structures

The aug-cc-pVTZ basis set was used for H, Ne, and Ar atoms, while the aug-cc-pVTZ-PP basis set was used for Kr and Xe atoms.

**Table S1:** Cartesian coordinates (in Angstroms) for the CCSD(T) minimum structures for  $\text{NgH}^+$

| <b>NeH<sup>+</sup></b> | <b>X</b> | <b>Y</b> | <b>Z</b> |
|------------------------|----------|----------|----------|
| H                      | 0.000000 | 0.000000 | 0.000000 |
| Ne                     | 0.000000 | 0.000000 | 0.992291 |
| <b>ArH<sup>+</sup></b> | <b>X</b> | <b>Y</b> | <b>Z</b> |
| H                      | 0.000000 | 0.000000 | 0.000000 |
| Ar                     | 0.000000 | 0.000000 | 1.282051 |
| <b>KrH<sup>+</sup></b> | <b>X</b> | <b>Y</b> | <b>Z</b> |
| H                      | 0.000000 | 0.000000 | 0.000000 |
| Kr                     | 0.000000 | 0.000000 | 1.413533 |
| <b>XeH<sup>+</sup></b> | <b>X</b> | <b>Y</b> | <b>Z</b> |
| H                      | 0.000000 | 0.000000 | 0.000000 |
| Xe                     | 0.000000 | 0.000000 | 1.598010 |

## B. Comparison of Mulliken Charges and Natural Atomic Charges

A comparison between the atomic charges ( $q$ ) obtained from a Mulliken population analysis and natural population analysis is presented on the table below. The natural population analysis was conducted using the NBO 3.1 program, which is available in the Gaussian 16 Rev. A03 suite of programs. The calculations were conducted at the MP2 level of theory. The aug-cc-pVTZ basis set was used for H, Ne, and Ar atoms, while the aug-cc-pVTZ-PP basis set was used for Kr and Xe atoms.

**Table S2:** Comparison between the Mulliken charges and natural atomic charges for  $\text{NgH}^+$  when the internuclear distance is at  $10\text{\AA}$ .

| Species                | Mulliken Charges |               | Natural Atomic Charges |               |
|------------------------|------------------|---------------|------------------------|---------------|
|                        | $q(\text{Ng})$   | $q(\text{H})$ | $q(\text{Ng})$         | $q(\text{H})$ |
| <b>NeH<sup>+</sup></b> | 0.00000          | 1.00000       | -0.00019               | 1.00000       |
| <b>ArH<sup>+</sup></b> | 0.00000          | 1.00000       | 0.00000                | 1.00000       |
| <b>KrH<sup>+</sup></b> | 0.00000          | 1.00000       | 0.00000                | 1.00000       |
| <b>XeH<sup>+</sup></b> | 1.01159          | -0.01159      | 0.99994                | -0.01160      |

## C. Sensitivity of the $\text{NgH}^+$ anharmonic frequencies with basis set's size

To assess the effect of the basis set's size on the anharmonic frequencies for  $\text{NgH}^+$ , we have built the one-dimensional anharmonic potential at the aug-cc-pVXZ ( $X=\text{T, Q, and 5}$ ) basis sets. The corresponding aug-cc-pVXZ-PP ( $X=\text{T, Q, and 5}$ ) were used for Kr and Xe atoms. To fully isolate the effect of the basis set's size the triple zeta minimum structures were used as the reference geometry, while the corresponding harmonic frequencies were used to define the Gauss-Hermite quadrature grids.

**Table S3:** Sensitivity of the  $\text{NgH}^+$  anharmonic frequencies ( $\text{cm}^{-1}$ ) with basis set's size.

| Basis Set <sup>a</sup> | NeH <sup>+</sup> | ArH <sup>+</sup> | KrH <sup>+</sup> | XeH <sup>+</sup> |
|------------------------|------------------|------------------|------------------|------------------|
| <b>aug-cc-pVTZ</b>     | 2710             | 2604             | 2436             | 2237             |
| <b>aug-cc-pVQZ</b>     | 2692             | 2595             | 2417             | 2235             |
| <b>aug-cc-pV5Z</b>     | 2683             | 2598             | 2421             | 2215             |

a) The Kr and Xe atoms, aug-cc-pVXZ-PP ( $X=\text{T, Q, and 5}$ ) were used.

## D. Cartesian coordinates for the NgH<sup>+</sup>Ng structures

**Table S4:** Cartesian coordinates (in Angstroms) for the CCSD(T) minimum structures for NgH<sup>+</sup>Ng

| NeH <sup>+</sup> Ne | X        | Y        | Z         |
|---------------------|----------|----------|-----------|
| H                   | 0.000000 | 0.000000 | 0.000000  |
| Ne                  | 0.000000 | 0.000000 | 1.139526  |
| Ne                  | 0.000000 | 0.000000 | -1.139526 |
| ArH <sup>+</sup> Ar | X        | Y        | Z         |
| H                   | 0.000000 | 0.000000 | 0.000000  |
| Ar1                 | 0.000000 | 0.000000 | 1.505819  |
| Ar2                 | 0.000000 | 0.000000 | -1.505819 |
| KrH <sup>+</sup> Kr | X        | Y        | Z         |
| H                   | 0.000000 | 0.000000 | 0.000000  |
| Kr                  | 0.000000 | 0.000000 | 1.651906  |
| Kr                  | 0.000000 | 0.000000 | -1.651906 |
| XeH <sup>+</sup> Xe | X        | Y        | Z         |
| H                   | 0.000000 | 0.000000 | 0.000000  |
| Xe                  | 0.000000 | 0.000000 | 1.857415  |
| Xe                  | 0.000000 | 0.000000 | -1.857415 |

### E. Cartesian coordinates for the $\text{NgH}^+\text{Ng}'$ structures

**Table S5:** Cartesian coordinates (in Angstroms) for the CCSD(T) minimum structures for  $\text{NgH}^+\text{Ng}'$

| <b>NeH<sup>+</sup>Kr</b> | <b>X</b> | <b>Y</b> | <b>Z</b>  |
|--------------------------|----------|----------|-----------|
| H                        | 0.000000 | 0.000000 | -0.711734 |
| Ne                       | 0.000000 | 0.000000 | -2.488247 |
| Kr                       | 0.000000 | 0.000000 | 0.71095   |

  

| <b>ArH<sup>+</sup>Kr</b> | <b>X</b> | <b>Y</b> | <b>Z</b>  |
|--------------------------|----------|----------|-----------|
| H                        | 0.000000 | 0.000000 | -0.444815 |
| Ar                       | 0.000000 | 0.000000 | -2.134319 |
| Kr                       | 0.000000 | 0.000000 | 1.079516  |

  

| <b>XeH<sup>+</sup>Kr</b> | <b>X</b> | <b>Y</b> | <b>Z</b>  |
|--------------------------|----------|----------|-----------|
| H                        | 0.000000 | 0.000000 | -0.257742 |
| Kr                       | 0.000000 | 0.000000 | -2.153823 |
| Xe                       | 0.000000 | 0.000000 | 1.440655  |

  

| <b>NeH<sup>+</sup>Xe</b> | <b>X</b> | <b>Y</b> | <b>Z</b>  |
|--------------------------|----------|----------|-----------|
| H                        | 0.000000 | 0.000000 | -1.022404 |
| Ne                       | 0.000000 | 0.000000 | -3.020352 |
| Xe                       | 0.000000 | 0.000000 | 0.578258  |

  

| <b>ArH<sup>+</sup>Xe</b> | <b>X</b> | <b>Y</b> | <b>Z</b>  |
|--------------------------|----------|----------|-----------|
| H                        | 0.000000 | 0.000000 | -0.732868 |
| Ar                       | 0.000000 | 0.000000 | -2.682581 |
| Xe                       | 0.000000 | 0.000000 | 0.907765  |

## F. Cartesian coordinates for the $\text{Ng}_3\text{H}^+$ T-shaped structures

**Table S6:** Cartesian coordinates (in Angstroms) for the CCSD(T) minimum structures for  $\text{Ng}_3\text{H}^+$  T-shaped isomer

| $\text{Ne}_3\text{H}^+$ | X        | Y         | Z         |
|-------------------------|----------|-----------|-----------|
| Ne                      | 0.000000 | 0.000000  | 1.690174  |
| H                       | 0.000000 | 0.000000  | -0.804845 |
| Ne                      | 0.000000 | 1.140219  | -0.804845 |
| Ne                      | 0.000000 | -1.140219 | -0.804845 |
| $\text{Ar}_3\text{H}^+$ | X        | Y         | Z         |
| Ar                      | 0.000000 | 0.000000  | 2.171611  |
| H                       | 0.000000 | 0.000000  | -1.056459 |
| Ar                      | 0.000000 | 1.505691  | -1.056459 |
| Ar                      | 0.000000 | -1.505691 | -1.056459 |
| $\text{Kr}_3\text{H}^+$ | X        | Y         | Z         |
| Kr                      | 0.000000 | 0.000000  | 2.309320  |
| H                       | 0.000000 | 0.000000  | -1.138843 |
| Kr                      | 0.000000 | 1.651551  | -1.138843 |
| Kr                      | 0.000000 | -1.651551 | -1.138843 |
| $\text{Xe}_3\text{H}^+$ | X        | Y         | Z         |
| Xe                      | 0.000000 | 0.000000  | 2.505180  |
| H                       | 0.000000 | 0.000000  | -1.241098 |
| Xe                      | 0.000000 | 1.856449  | -1.241098 |
| Xe                      | 0.000000 | -1.856449 | -1.241098 |

## G. Cartesian coordinates for the $\text{Ng}_3\text{H}^+$ linear structures

**Table S7:** Cartesian coordinates (in Angstroms) for the CCSD(T) minimum structures for  $\text{Ng}_3\text{H}^+$  linear isomer

| $\text{Ne}_3\text{H}^+$ | X        | Y        | Z         |
|-------------------------|----------|----------|-----------|
| Ne                      | 0.000000 | 0.000000 | -2.387227 |
| H                       | 0.000000 | 0.000000 | -1.243891 |
| Ne                      | 0.000000 | 0.000000 | -0.108869 |
| Ne                      | 0.000000 | 0.000000 | 2.620485  |
| $\text{Ar}_3\text{H}^+$ | X        | Y        | Z         |
| Ar                      | 0.000000 | 0.000000 | -3.106371 |
| H                       | 0.000000 | 0.000000 | -1.573695 |
| Ar                      | 0.000000 | 0.000000 | -0.094181 |
| Ar                      | 0.000000 | 0.000000 | 3.287979  |
| $\text{Kr}_3\text{H}^+$ | X        | Y        | Z         |
| Kr                      | 0.000000 | 0.000000 | -3.366750 |
| H                       | 0.000000 | 0.000000 | -1.671785 |
| Kr                      | 0.000000 | 0.000000 | -0.058093 |
| Kr                      | 0.000000 | 0.000000 | 3.471282  |
| $\text{Xe}_3\text{H}^+$ | X        | Y        | Z         |
| Xe                      | 0.000000 | 0.000000 | -3.747465 |
| H                       | 0.000000 | 0.000000 | -1.807847 |
| Xe                      | 0.000000 | 0.000000 | -0.017128 |
| Xe                      | 0.000000 | 0.000000 | 3.798072  |



## H. Compilation of CCSD(T)/aug-cc-pVTZ<sup>a</sup> electronic energy, zero-point energy, standard enthalpy, and standard free energies for protonated noble gas clusters

**Table S8:** Energy, zero-point energy, standard enthalpy, and standard free energies in Hartree

| <b>Monomers</b>  | <b>E</b>    | <b>ZPE</b> | <b>H</b><br>(298.15 K, 1 atm) | <b>G</b><br>(298.15 K, 1 atm) |
|------------------|-------------|------------|-------------------------------|-------------------------------|
| NeH <sup>+</sup> | -128.897819 | 0.006715   | -128.887800                   | -128.907720                   |
| ArH <sup>+</sup> | -527.199804 | 0.006219   | -527.190280                   | -527.211654                   |
| KrH <sup>+</sup> | -462.630050 | 0.005787   | -462.620958                   | -462.643561                   |
| XeH <sup>+</sup> | -328.734262 | 0.005296   | -328.725661                   | -328.749134                   |

  

| <b>Dimers</b>       | <b>E</b>    | <b>ZPE</b> | <b>H</b><br>(298.15 K, 1 atm) | <b>G</b><br>(298.15 K, 1 atm) |
|---------------------|-------------|------------|-------------------------------|-------------------------------|
| NeH <sup>+</sup> Ne | -257.737161 | 0.008745   | -257.724786                   | -257.749238                   |
| ArH <sup>+</sup> Ar | -1054.27338 | 0.006119   | -1054.263362                  | -1054.290458                  |
| KrH <sup>+</sup> Kr | -925.115037 | 0.005710   | -925.105189                   | -925.134599                   |
| XeH <sup>+</sup> Xe | -657.297045 | 0.004994   | -657.287724                   | -657.318839                   |
| NeH <sup>+</sup> Kr | -591.447159 | 0.007232   | -591.435170                   | -591.465004                   |
| ArH <sup>+</sup> Kr | -989.695721 | 0.006375   | -989.685159                   | -989.714465                   |
| XeH <sup>+</sup> Kr | -791.208460 | 0.005941   | -791.198128                   | -791.229577                   |
| NeH <sup>+</sup> Xe | -457.549701 | 0.006458   | -457.538166                   | -457.569680                   |
| ArH <sup>+</sup> Xe | -855.792707 | 0.006382   | -855.781727                   | -855.812754                   |

  

| <b>Trimers<br/>(T-shaped)</b>  | <b>E</b>     | <b>ZPE</b> | <b>H</b><br>(298.15 K, 1 atm) | <b>G</b><br>(298.15 K, 1 atm) |
|--------------------------------|--------------|------------|-------------------------------|-------------------------------|
| Ne <sub>3</sub> H <sup>+</sup> | -386.552085  | 0.008987   | -386.537376                   | -386.570957                   |
| Ar <sub>3</sub> H <sup>+</sup> | -1581.325382 | 0.006287   | -1581.312971                  | -1581.350523                  |
| Kr <sub>3</sub> H <sup>+</sup> | -1387.577217 | 0.005821   | -1387.565033                  | -1387.605940                  |
| Xe <sub>3</sub> H <sup>+</sup> | -985.838738  | 0.005095   | -985.827064                   | -985.870303                   |

  

| <b>Trimers<br/>(Linear)</b>    | <b>E</b>     | <b>ZPE</b> | <b>H</b><br>(298.15 K, 1 atm) | <b>G</b><br>(298.15 K, 1 atm) |
|--------------------------------|--------------|------------|-------------------------------|-------------------------------|
| Ne <sub>3</sub> H <sup>+</sup> | -386.550704  | 0.008947   | -386.535484                   | -386.571855                   |
| Ar <sub>3</sub> H <sup>+</sup> | -1581.324280 | 0.006357   | -1581.311316                  | -1581.350431                  |
| Kr <sub>3</sub> H <sup>+</sup> | -1387.576377 | 0.005966   | -1387.563602                  | -1387.605251                  |
| Xe <sub>3</sub> H <sup>+</sup> | -985.838118  | 0.005350   | -985.825752                   | -985.869327                   |

a) The aug-cc-pVTZ-PP basis set was used for Kr and Xe atoms
